# Supplementary material for: First Report of the Plasmid-mediated fosB Gene in Enterococcus faecalis from Pigs
Source: MDPI journal article supplement (doi:10.3390/genes12111684), 2021-10-23
Supplement: s1 [file s1]

## Supplementary material

Table S1 primers used in this study.

| Gene        | Sequence                     | Amplicon size (bp) | reference          |
|-------------|------------------------------|--------------------|--------------------|
| <i>fosA</i> | F: GCTGCACGCCCCGCTGGAATA     | 217                | Zhang et al., 2020 |
|             | R: -CGACGCCCCCTCGCTTTTGT     |                    |                    |
| <i>fosB</i> | F: CAGAGATATTTAGGGGCTGACA    | 312                | Zhang et al., 2020 |
|             | R: CTCAATCTATCTTCTAAACTTCCTG |                    |                    |
| <i>fosC</i> | F: GGGTTACATGCCCTTGCTCA      | 354                | Zhang et al., 2020 |
|             | R: AACCCGCACAACGACAGATG      |                    |                    |
| <i>fosX</i> | F: ATGATCAGTCATATGACATTTATCG | 243                | Zhang et al., 2020 |
|             | R: ATTTAGCCCCTTGTCGATAACG    |                    |                    |

Zhang, X., Bi, W., Chen, L., Zhang, Y., Fang, R., Cao, J., Zhou, T., 2020, Molecular mechanisms and epidemiology of fosfomycin resistance in enterococci isolated from patients at a teaching hospital in China, 2013-2016. J Glob Antimicrob Resist 20, 191-196.



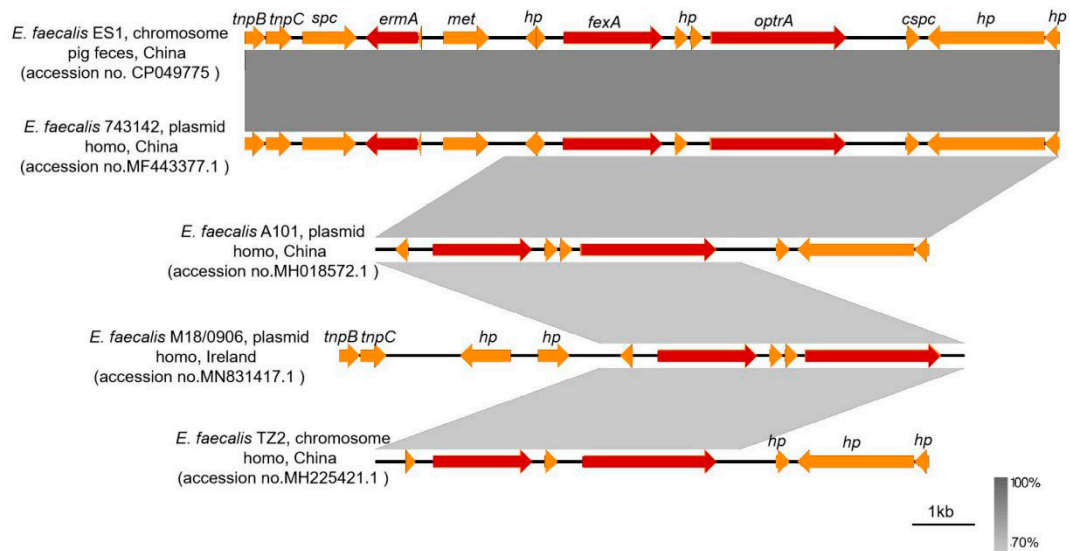

**Fig S2.** Genetic environment of *optrA*. Schematic representation and comparison of the genetic environment of the *optrA*-flanking region from this study and previous reported. Arrows indicate the direction of transcription of each of the genes, and different genes are shown in different colors. Regions of  $\geq 70.0\%$  nucleotide sequence identity are shaded in grey.
