# Supplementary material for: First Report of the Plasmid-mediated fosB Gene in Enterococcus faecalis from Pigs
Source: Genes (Basel). 2021 Oct 23;12(11):1684. doi: 10.3390/genes12111684 (PMC8624268; doi:10.3390/genes12111684)
Supplement: Supplementary file 1 [file genes-12-01684-s001.zip › Supplementary material Table S2.xls]

## Sheet: Enterococcus faecium
Table S1. Minimum inhibitory concentrations (MIC, μg/ml) of tested antimicrobial agents for the studied bacterial isolates.
Enterococcus faecium	Penicillin	Ampicillin	Vancomycin	Erythromycin	Tetracycline	Marbofloxacin	Florfenicol	Rifampin	Linezolid	Valnemulin	Streptomycin	Gentamycin	Fosfomycin
AKJ15	4	16	2	＞256	256	2	1	0.25	0.5	2	-	+	256
AKJ45	16	64	1	＞256	256	8	32	4	4	32	+	+	256
2KJ25	4	16	2	＞256	64	4	4	2	2	256	+	+	1024
2KJ26	1	16	2	＞256	128	32	64	1	8	128	+	+	1024
2KJ29	4	16	2	＞256	64	2	4	8	2	256	+	+	256
2KJ31	2	8	2	＞256	64	32	64	0.5	4	64	+	+	1024
2KJ34	2	8	2	＞256	64	32	32	0.25	4	16	+	+	1024
2KB6	16	64	1	＞256	64	4	16	1	1	2	-	-	256
XM3	2	4	2	256	128	4	32	4	4	4	+	+	256
XM12	4	8	0.5	256	128	0.5	64	0.125	4	8	-	-	512
XM13	4	8	2	256	128	4	32	4	4	2	+	+	512
XM21	64	128	2	256	128	16	32	2	4	8	+	+	256
XM35	4	16	2	256	64	4	32	8	2	4	+	+	1024
QF21-2	8	16	1	＞256	128	4	64	＞32	2	4	+	+	256
QF25-1	64	256	2	＞256	64	2	16	4	2	4	-	-	512
WZ18-1	16	16	2	＞256	128	4	32	2	2	≤0.5	-	-	256
WZ20-2	8	16	2	＞256	32	2	32	2	2	≤0.5	-	-	256
HDB04-1	＞256	＞256	2	＞256	128	＞32	32	＞64	8	8	+	-	1024
HDB07-1	8	16	0.5	64	128	8	32	0.25	4	4	+	+	256
WZ34-1	8	16	0.5	128	64	4	32	0.5	2	≤0.5	+	+	256
WZ37-1	16	16	2	128	64	8	16	0.5	2	2	+	+	256
WZ39-1	16	16	2	＞256	128	＞32	16	2	4	8	+	+	256
HDC14-1	2	2	1	256	128	32	32	16	4	4	-	+	256
GM24-1	64	128	2	256	128	＞32	16	64	2	16	+	+	1024
HM20-2	32	32	0.5	64	64	1	8	0.5	1	2	+	+	256
FH1-1	64	32	2	＞256	128	4	8	4	1	4	-	-	256
Antimicrobial susceptibilities were interpreted as resistant (red text) or susceptible (black text)
HLGR, high-level gentamicin resistance; HLSR, high-level streptomycin resistance;+ indicates positive for HLGR/HLSR; – not HLGR/HLSR.

## Sheet: Enterococcus faecalis
Table S2. Minimum inhibitory concentrations (MIC, μg/ml) of tested antimicrobial agents for the studied bacterial isolates.
Enterococcus faecalis	Penicillin	Ampicillin	Vancomycin	Erythromycin	Tetracycline	Marbofloxacin	Florfenicol	Rifampin	Linezolid	Valnemulin	Streptomycin	Gentamycin	Fosfomycin
HC24-1	1	4	2	＞256	128	4	64	1	8	16	+	+	512
HC30	1	4	2	＞256	256	32	64	4	4	64	+	+	256
HC88-1	2	8	2	＞256	64	32	64	2	8	64	+	+	256
HC96-1	1	8	2	256	64	4	128	1	8	64	+	+	512
JH72-1	2	8	2	＞256	128	32	64	1	8	16	+	+	512
ES-1	4	4	2	＞256	128	32	64	8	4	64	+	+	2048
ES-2	2	8	4	＞256	128	32	64	8	8	128	+	+	2048
SH40	2	8	4	256	128	4	64	8	8	128	-	-	512
XM26	2	2	1	256	64	2	32	2	4	64	+	-	2048
XM37	4	4	0.5	64	64	0.5	16	8	8	2	+	+	256
XM40	2	4	1	256	64	32	64	1	8	64	+	+	256
XM38B	2	4	1	＞256	64	32	64	8	16	64	+	+	256
SF13-2	4	4	1	＞256	128	32	64	0.5	8	64	+	+	512
SF15-1	32	32	1	256	128	32	64	2	8	32	+	+	256
SF19-1	8	8	1	＞256	64	32	64	1	8	64	+	+	512
SF57-1	2	4	1	＞256	64	32	64	2	4	64	+	+	256
SF60-1	2	2	1	＞256	128	32	64	0.5	8	64	+	+	512
WZ21-2	2	4	0.5	256	64	0.5	16	1	2	8	+	+	512
WZ25-1	2	4	1	＞256	128	16	64	16	8	64	+	+	1024
QF6-2	2	4	0.5	256	64	16	64	1	4	32	+	+	512
QF7-1	2	4	2	＞256	128	8	64	2	8	64	-	-	256
HDC20-2	2	4	0.5	＞256	128	16	32	0.125	4	64	+	+	512
GM30	2	8	1	＞256	64	1	32	4	8	32	+	+	256
HM13-2	4	4	2	＞256	64	32	64	2	8	64	+	+	256
HM23-1	2	8	1	＞256	128	＞32	64	8	8	64	+	+	256
HM12-1	2	8	1	＞256	128	32	64	16	8	64	+	+	256
HM14-2	1	4	1	＞256	64	32	4	8	4	64	+	+	256
FH16-1	1	4	1	＞256	128	32	32	4	8	64	+	+	256
Antimicrobial susceptibilities were interpreted as resistant (red text) or susceptible (black text).
HLGR, high-level gentamicin resistance; HLSR, high-level streptomycin resistance;+ indicates positive for HLGR/HLSR; – not HLGR/HLSR.
